# Supplementary material for: The effect of MnCO3 on the gain coefficient for the 4I13/2 → 4I15/2 transition of Er3+ ions and near-infrared emission bandwidth flatness of Er3+/Tm3+/Yb3+ co-doped barium zinc silicate glasses
Source: Royal Society of Chemistry journal article supplement (doi:10.1039/d3ra06348h), 2023-01-01
Supplement: d3ra06348h1.pdf [file d3ra06348h1.pdf]

## Electronic Supplementary Information

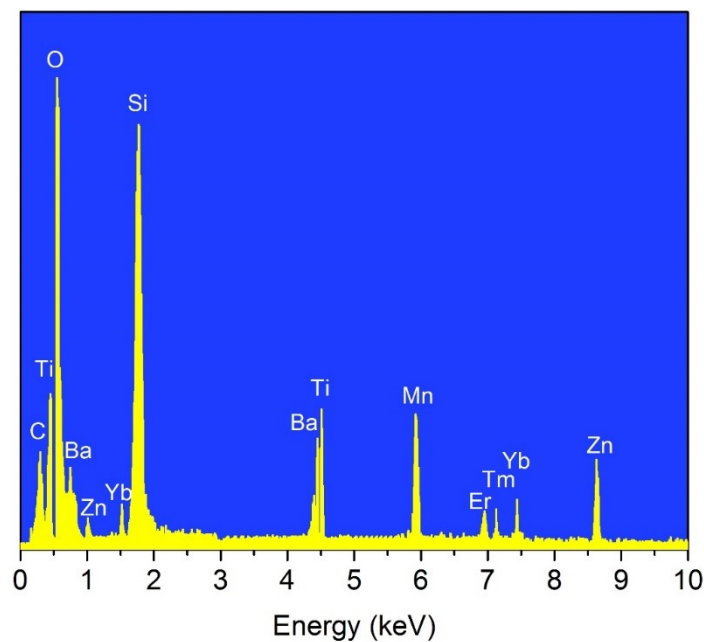

Fig. S1 EDS spectrum analysis of SZB-0.5Er1Tm2Yb2Mn glass sample.

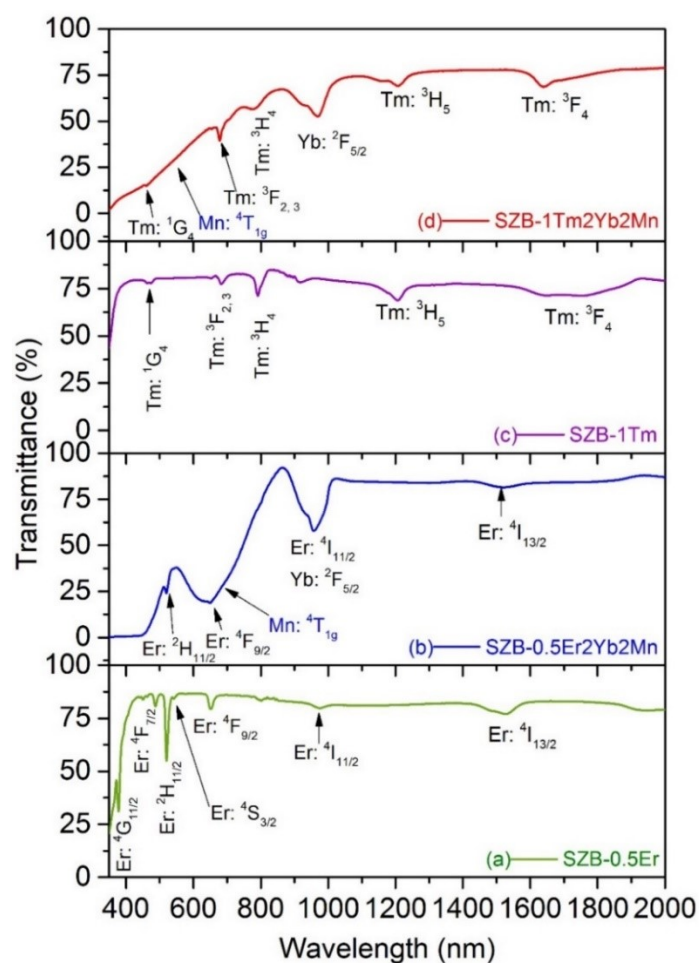

Fig. S2(A) Optical transmittance spectra of SZB-0.5Er, SZB-0.5Er2Yb2Mn, SZB-1Tm, and SZB-1Tm2Yb2Mn glass samples.

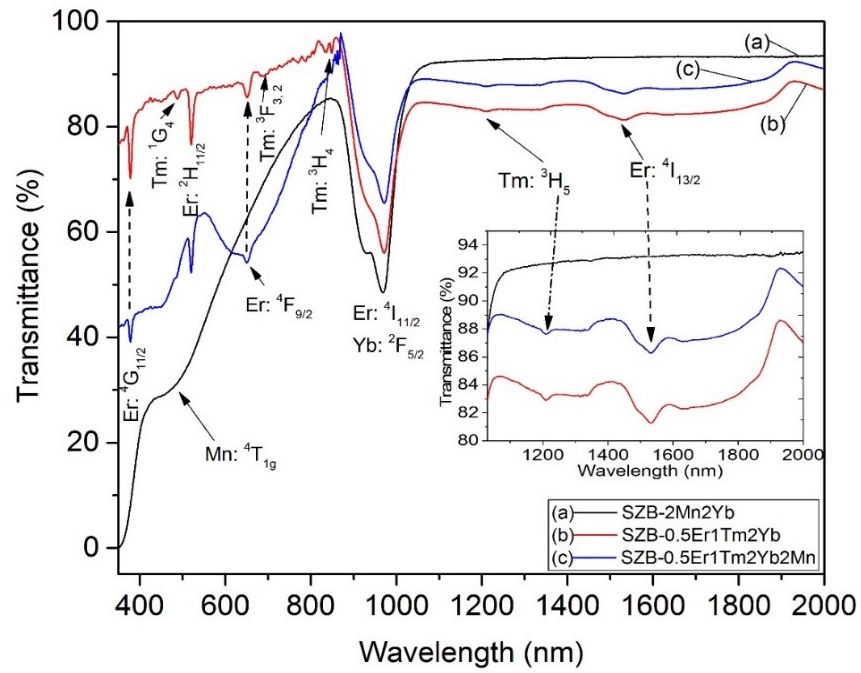

Fig. S2(B) Optical transmittance spectra of SZB-2Mn2Yb, SZB-0.5Er1Tm2Yb, and SZB-0.5Er1Tm2Yb2Mn glass samples.

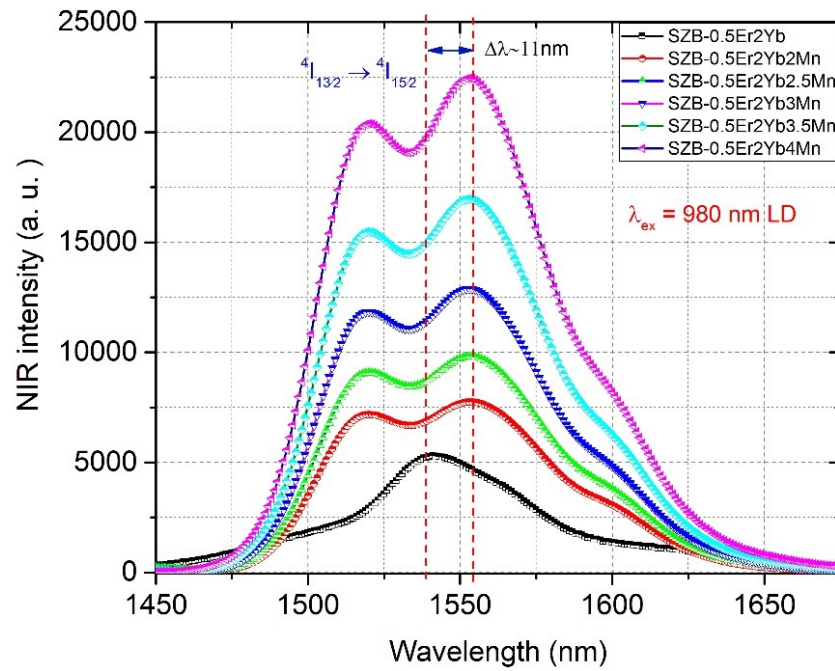

Fig. S3 NIR emission spectra of SZB-0.5Er2YbxMn ( $x = 0, 2, 2.5, 3, 3.5,$  and  $4$  mol. %) glass samples.

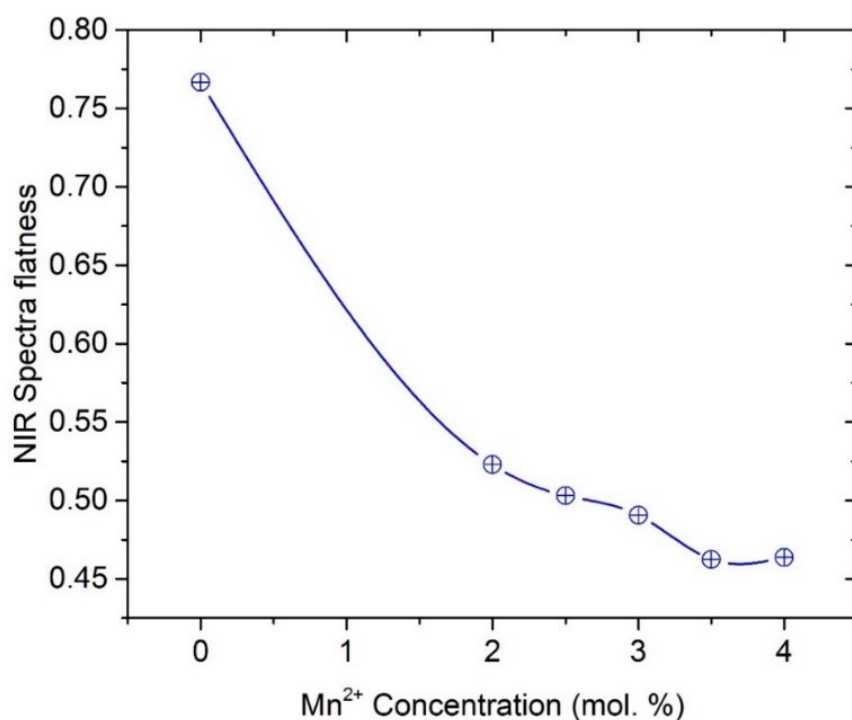

Fig. S4 Relationship between NIR spectra flatness of SZB-0.5Er<sub>2</sub>Yb<sub>x</sub>Mn (x = 0, 2, 2.5, 3, 3.5, and 4 mol. %) glass samples and molar concentration of Mn<sup>2+</sup> ions.

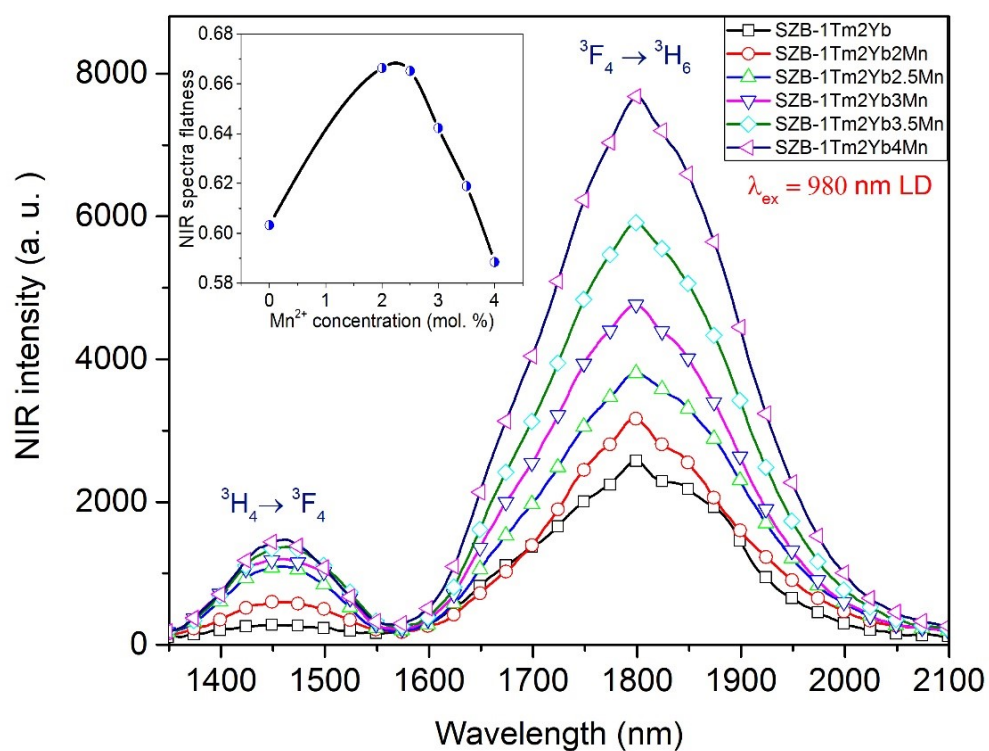

Fig. S5 NIR emission spectra of SZB-1Tm<sub>2</sub>Yb<sub>x</sub>Mn (x = 0, 2, 2.5, 3, 3.5, and 4 mol. %) glass samples.

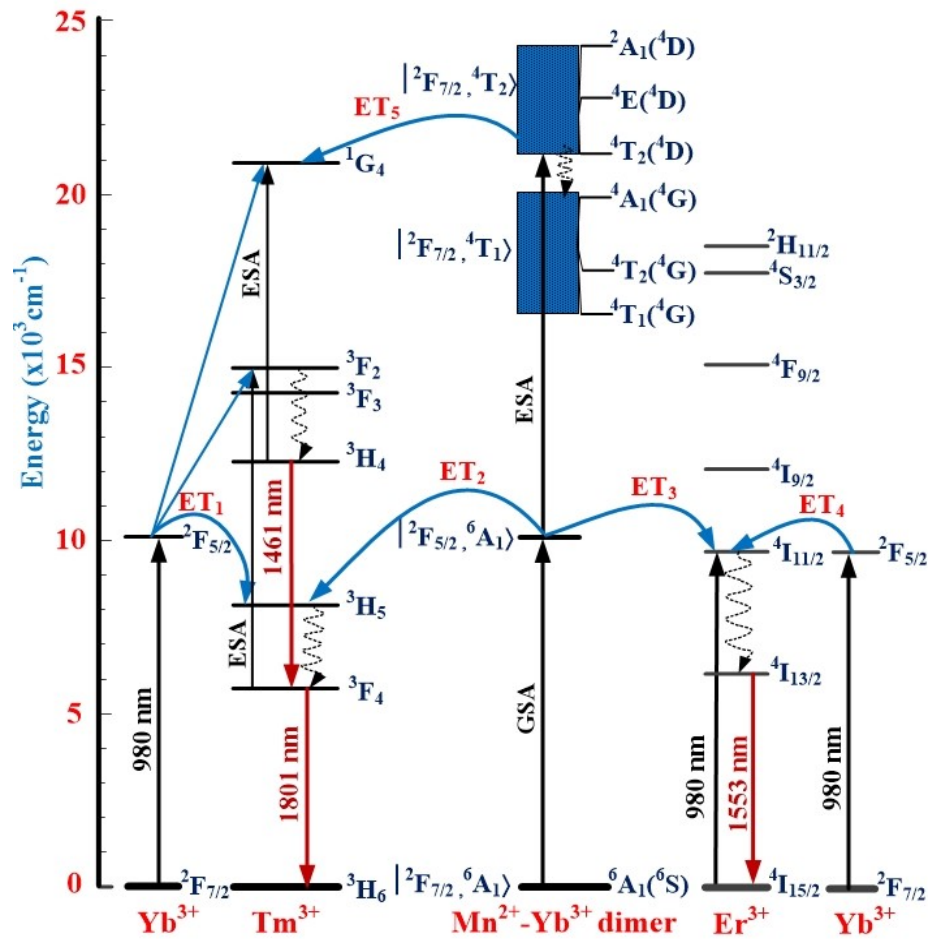

Fig. S6 Energy levels of  $\text{Er}^{3+}$ ,  $\text{Tm}^{3+}$ ,  $\text{Yb}^{3+}$ ,  $\text{Mn}^{2+}\text{-Yb}^{3+}$  dimer and mechanisms of  $\text{ET}_I$  ( $I = 1, 2, 3, 4,$  and  $5$ ) processes in SZB glass system.

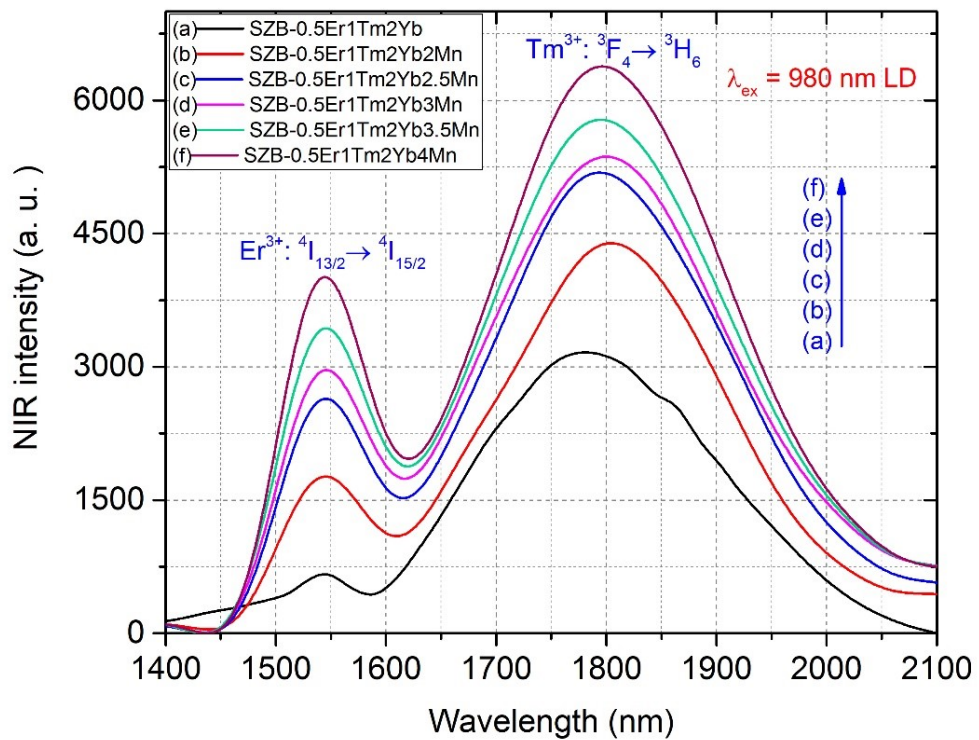

Fig. S7 NIR emission spectra of SZB-0.5Er1Tm2YbxMn ( $x = 0, 2, 2.5, 3, 3.5,$  and  $4$  mol. %) glass samples.

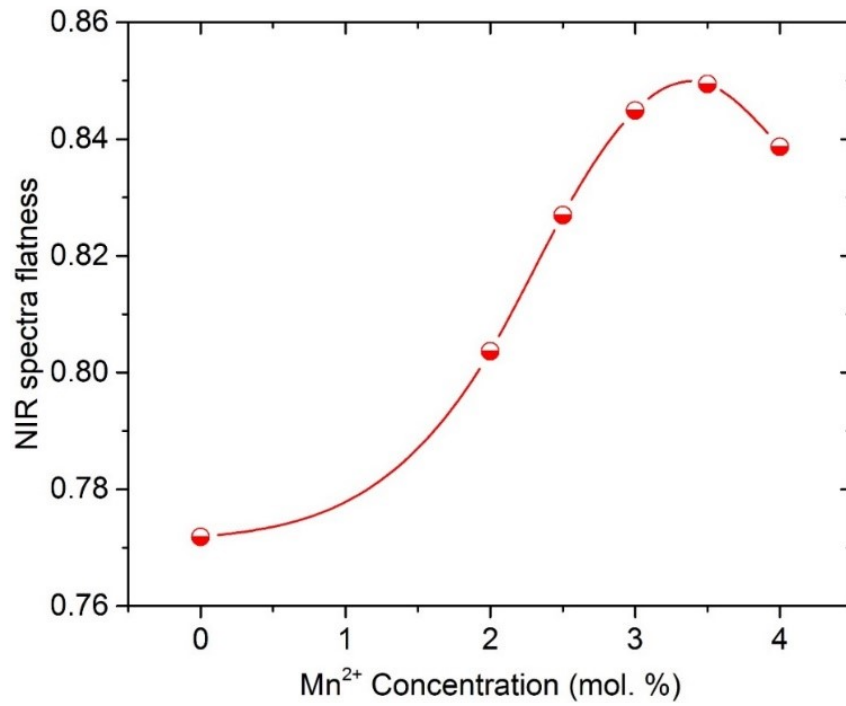

Fig. S8 The relationship between the molar concentration of Mn<sup>2+</sup> ions and NIR\_EBF parameter of SZB-0.5Er1Tm2YbxMn (x = 0, 2, 2.5, 3, 3.5, and 4 mol. %) glass samples.

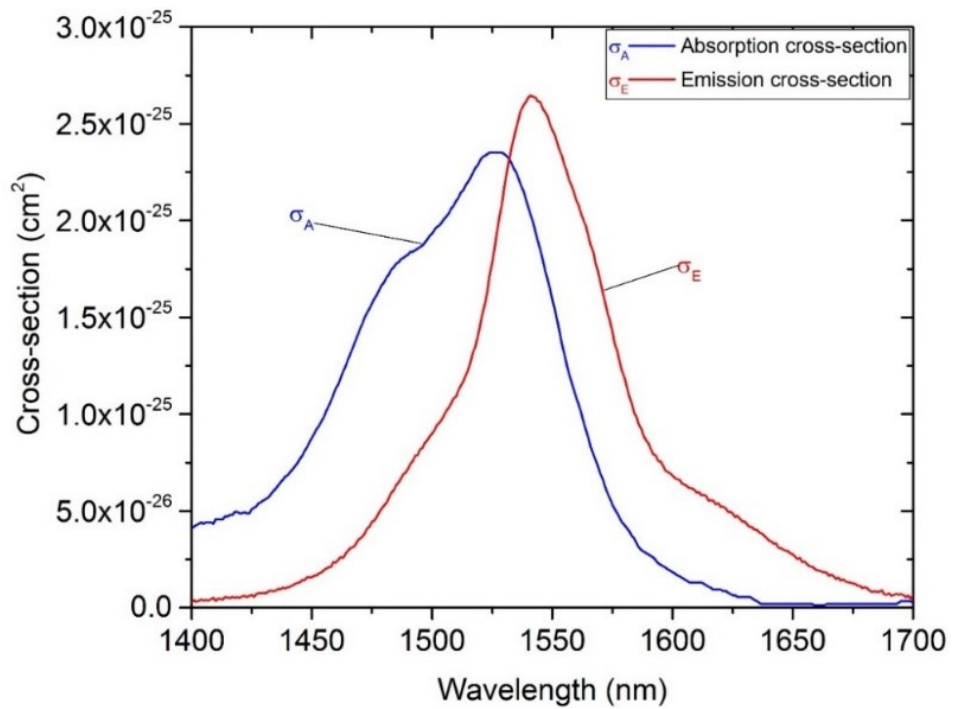

Fig. S9 Absorption and emission cross-sections of SZB-0.5Er glass sample.

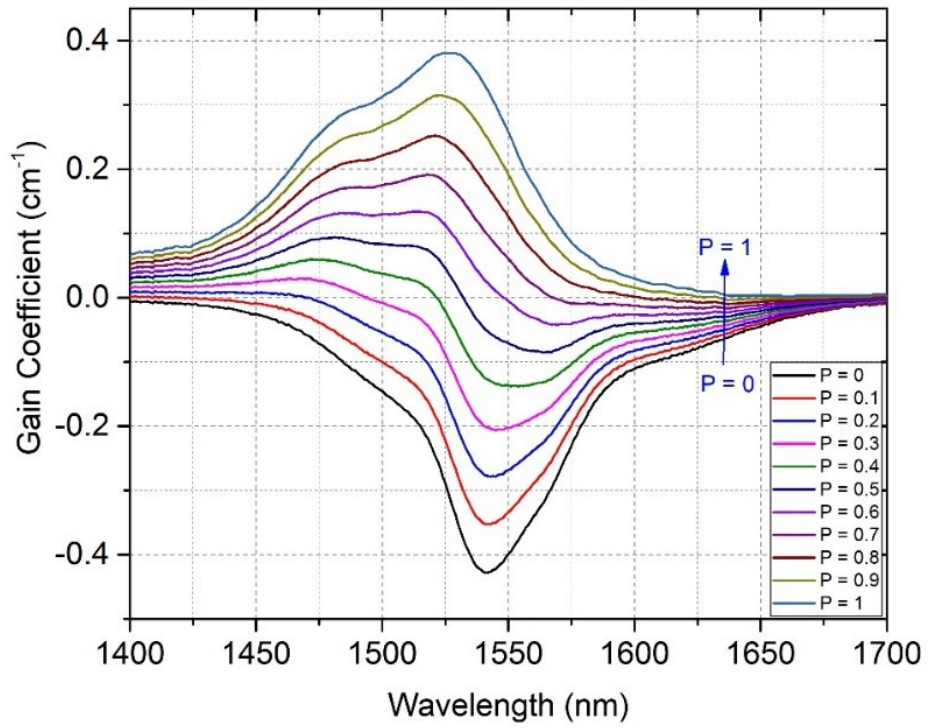

Fig. S10 Gain coefficient for the  ${}^4I_{13/2} \rightarrow {}^4I_{15/2}$  transition of  $\text{Er}^{3+}$  ions in SZB-0.5Er glass sample

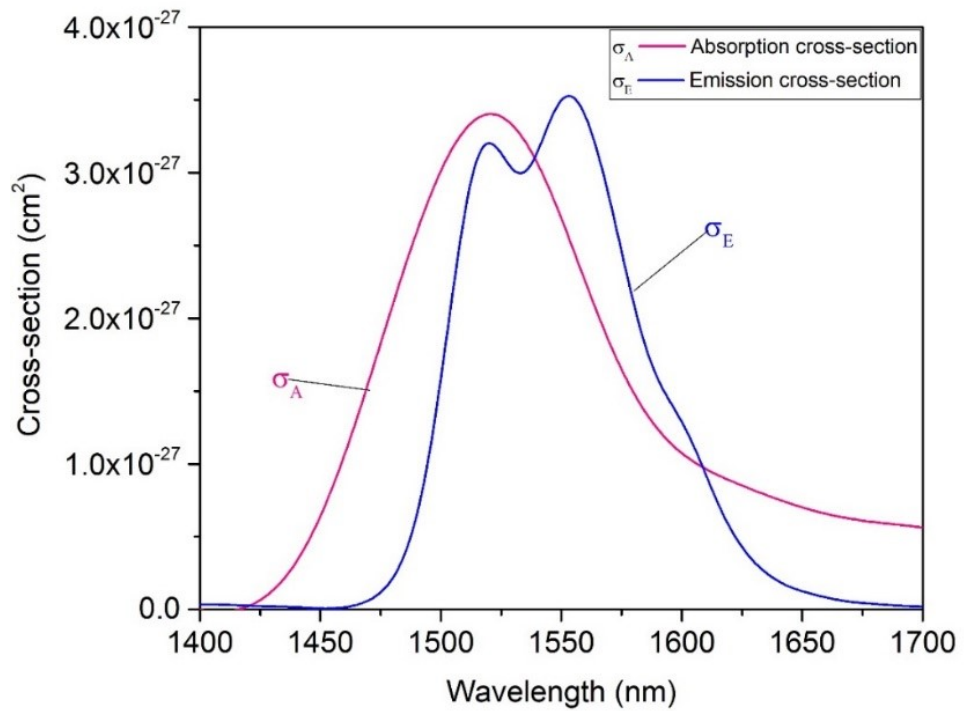

Fig. S11 Absorption and emission cross-sections of SZB-0.5Er<sub>2</sub>Yb<sub>2</sub>Mn glass sample.

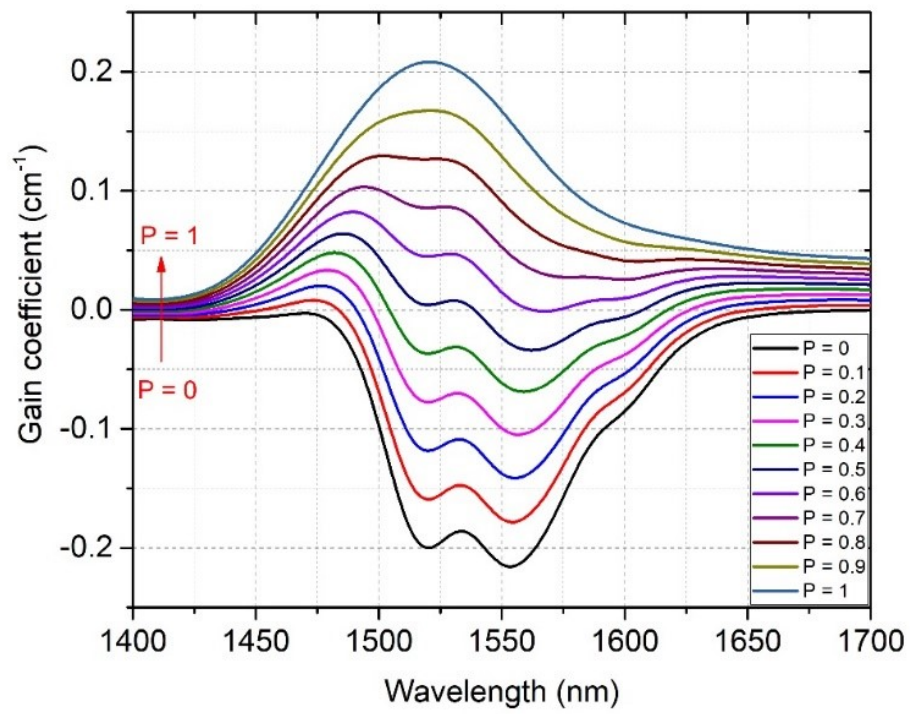

Fig. S12 Gain coefficient for the  ${}^4I_{13/2} \rightarrow {}^4I_{15/2}$  transition of  $\text{Er}^{3+}$  ions in SZB-0.5Er2Yb2Mn glass sample
